# Supplementary material for: Single-base mapping of m6A by an antibody-independent method
Source: PubMed Central journal article supplement — Sci Adv. 2019 Jul 3;5(7):eaax0250. doi: 10.1126/sciadv.aax0250 (PMC6609220; doi:10.1126/sciadv.aax0250), 2019-07-03
Supplement: aax0250_SM.pdf [file aax0250_SM.pdf]

## Supplementary Materials for

### Single-base mapping of m<sup>6</sup>A by an antibody-independent method

Zhang Zhang, Li-Qian Chen, Yu-Li Zhao, Cai-Guang Yang, Ian A. Roundtree, Zijie Zhang, Jian Ren, Wei Xie, Chuan He, Guan-Zheng Luo\*

\*Corresponding author. Email: luogzh5@mail.sysu.edu.cn

Published 3 July 2019, *Sci. Adv.* **5**, eaax0250 (2019)  
DOI: 10.1126/sciadv.aax0250

#### This PDF file includes:

- Fig. S1. Quantitative demonstration of various fractions of m<sup>6</sup>A-containing oligo mixed with unmethylated oligo digested by ChpBK.
- Fig. S2. FTO demethylate assay.
- Fig. S3. The base composition of mRNA products cleaved by MazF.
- Fig. S4. The single-site validation for 18S rRNA control site and m<sup>6</sup>A site.
- Fig. S5. The single-site validation of eight m<sup>6</sup>A sites and one unmethylated site.
- Fig. S6. Quantitative PCR results of six m<sup>6</sup>A sites.
- Fig. S7. Metagene plots of m<sup>6</sup>A in mouse heart and mouse testis.
- Fig. S8. Conservation of m<sup>6</sup>A in mammalian kidney.
- Fig. S9. Conservation of m<sup>6</sup>A in mammalian liver.
- Fig. S10. Gene expression and the expected number of shared m<sup>6</sup>A-modified genes.
- Fig. S11. Evolutionary conservation between methylated and unmethylated A sites in the same genes of brain tissue.
- Fig. S12. Evolutionary conservation between methylated and unmethylated A sites in the same genes of kidney tissue.
- Fig. S13. Evolutionary conservation between methylated and unmethylated A sites in the same genes of liver tissue.
- Fig. S14. Conservation scores for brain.
- Fig. S15. Validation for the methylation sensitivity of mutated MazF-K56A.
- Table S1. Basic information of sequencing data for human HEK293T cell line.
- Table S2. Designed probes and universal primers for T3 ligase-based validation.
- Table S3. Designed primers for Quantitative PCR validation.
- Table S4. Basic information of sequencing data for mammalian tissues.
- Table S5. m<sup>6</sup>A sites identified by m<sup>6</sup>A-REF-seq for mammalian tissues.
- Table S6. Shared m<sup>6</sup>A-modified genes and m<sup>6</sup>A sites between pairwise species and the significance.

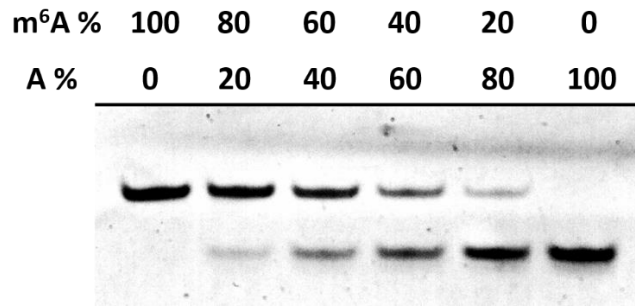

**Fig. S1. Quantitative demonstration of various fractions of m<sup>6</sup>A-containing oligo mixed with unmethylated oligo digested by ChpBK.**

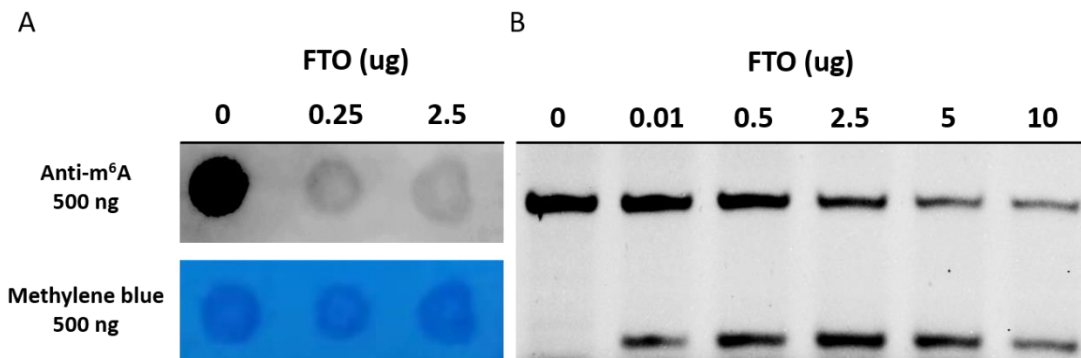

**Fig. S2. FTO demethylate assay. (A) Dot-blot assay. (B) Detection of FTO demethylation reaction with different FTO concentration by MazF cleavage assay.**

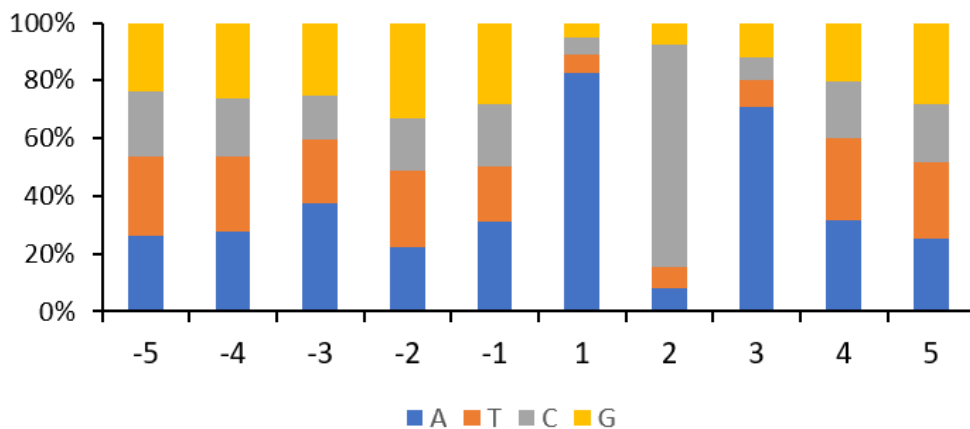

**Fig. S3. The base composition of mRNA products cleaved by MazF. The x-axis indicates the relative position to 5' terminal. Most reads contained the ACA 5' end as shown in the position 1, 2 and 3.**

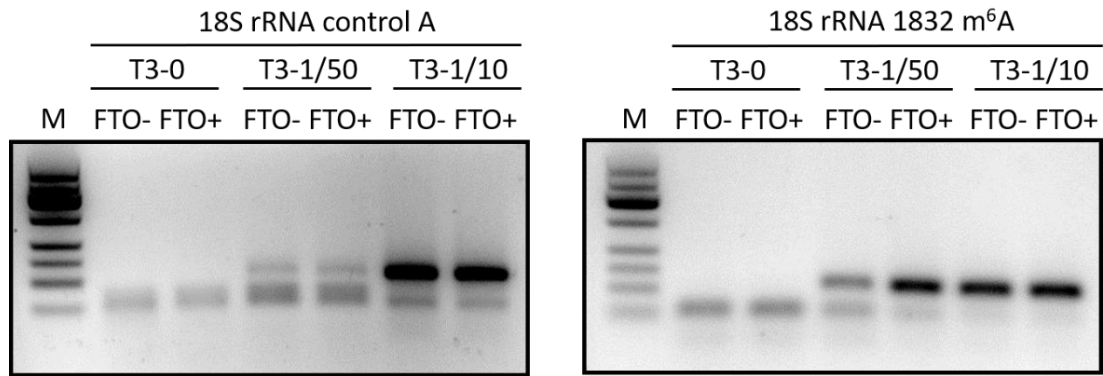

**Fig. S4. The single-site validation for 18S rRNA control site and m<sup>6</sup>A site.** The ligation reaction with 500 ng total RNA template was performed at room temperature for 10 min. Different amounts (1/10 ul to 1/50 ul) of T3 ligase was used. FTO- indicated the reaction without FTO demethylation while FTO+ indicated the FTO treatment. The 1/50 ul T3 ligase reaction was able to distinguish the m<sup>6</sup>A from A. M indicated the 50 bp marker, ranging from 50 bp to 600 bp.

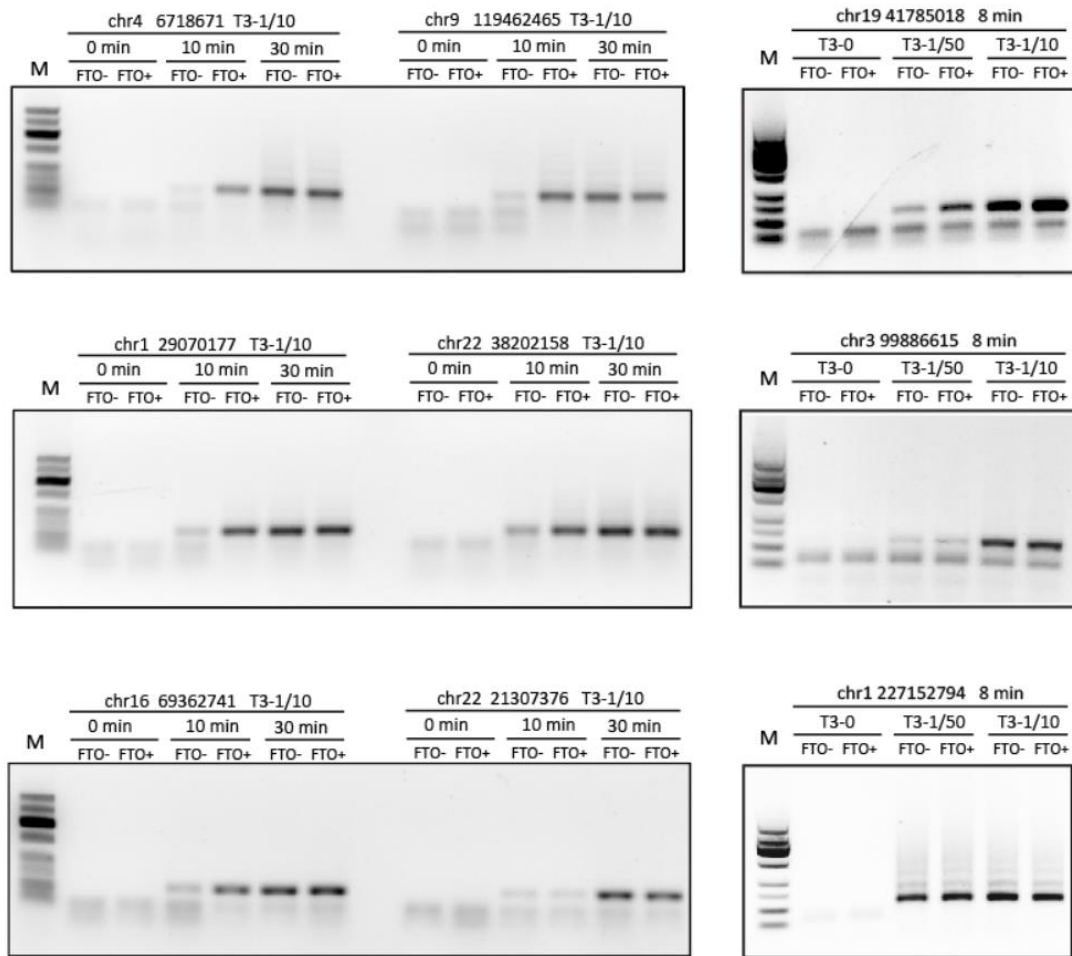

**Fig. S5. The single-site validation of eight m<sup>6</sup>A sites and one unmethylated site.** Eight m<sup>6</sup>A sites and one A site (chr22: 21307376) were picked from m<sup>6</sup>A-REF-seq. Six out of eight m<sup>6</sup>A sites were confirmed to be m<sup>6</sup>A sites. The amount of T3 ligase (ul) and ligation time in each reaction were indicated in the figures. FTO<sup>-</sup> indicated the mRNA without FTO demethylation while FTO<sup>+</sup> indicated the FTO treatment. M indicated the 50 bp marker, ranging from 50 bp to 600 bp.

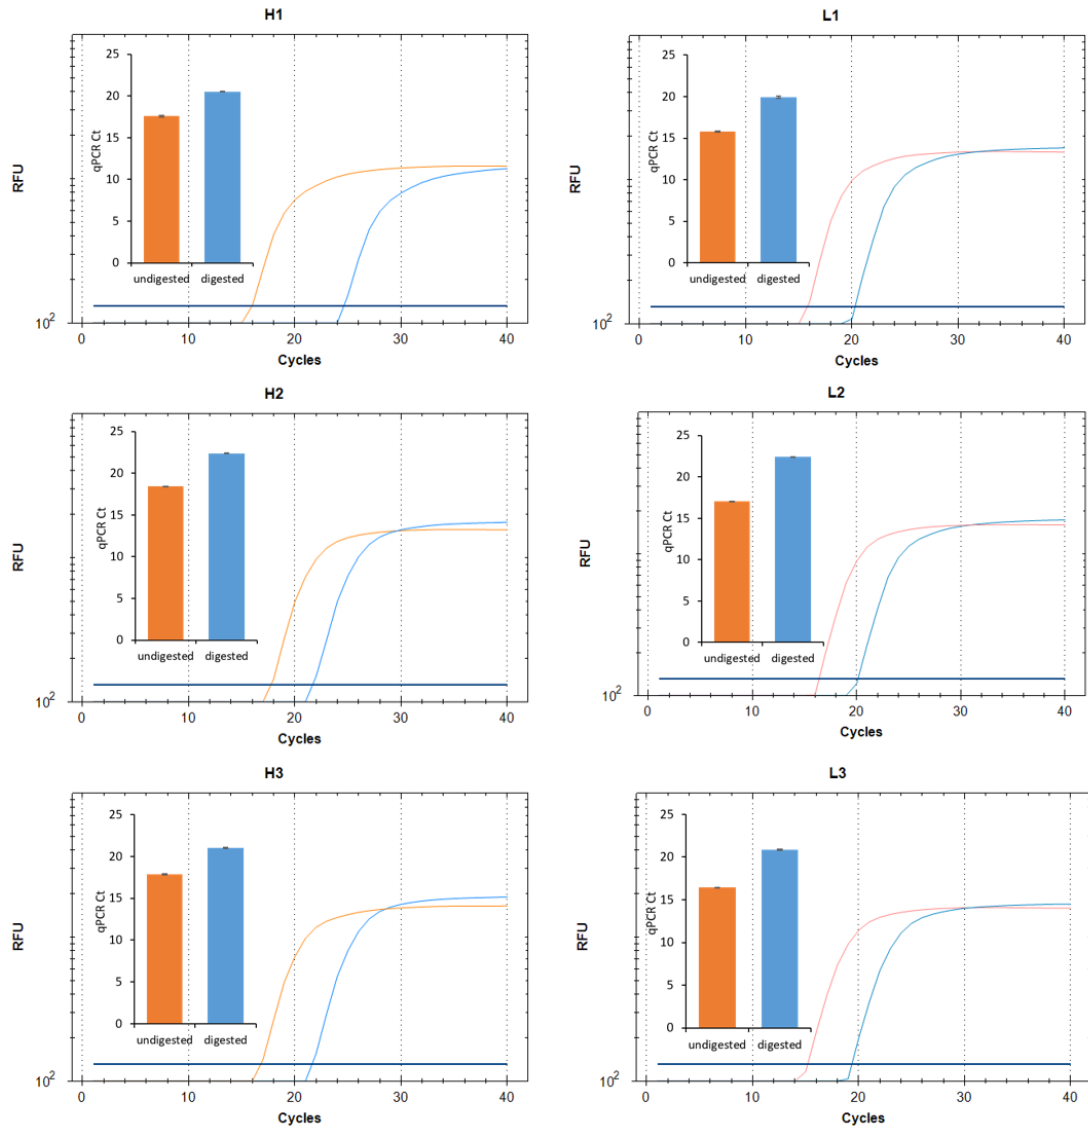

**Fig. S6. Quantitative PCR results of six m<sup>6</sup>A sites.** H1-H3 were high level methylated sites (> 0.75) while L1-L3 were low level methylated sites (< 0.35). See Supplementary Table S3 for designed primers.

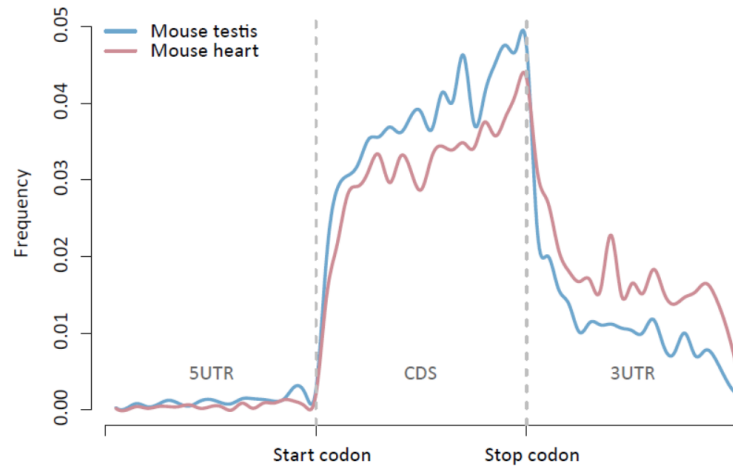

**Fig. S7. Metagene plots of m<sup>6</sup>A in mouse heart and mouse testis.**

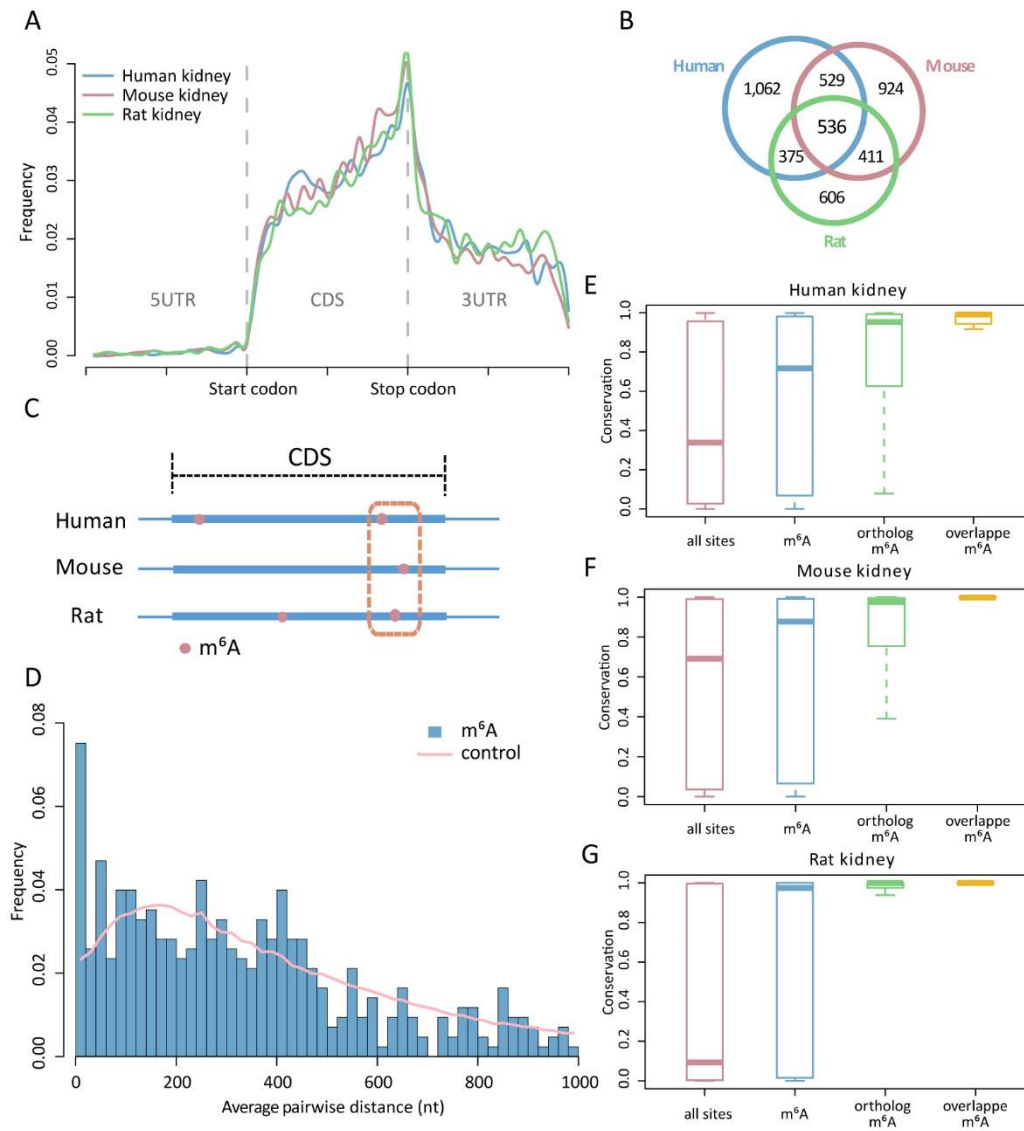

**Fig. S8. Conservation of m<sup>6</sup>A in mammalian kidney.** (A) Metagenes plots of m<sup>6</sup>A in the kidney of human, mouse and rat. (B) Shared m<sup>6</sup>A-modified genes among three species. (C) Diagram showing the m<sup>6</sup>A sites conserved in the corresponding short regions from different species. (D) Frequency of distances for pairwise m<sup>6</sup>A in kidney. Randomly picked ACA motifs were assigned for the same analysis as control. (E-G) Conservation scores of all m<sup>6</sup>A sites, methylation sites in ortholog genes and conserved m<sup>6</sup>A sites were compared to that for all A sites in ACA motifs (Wilcoxon test, p-values < 2×10<sup>-7</sup>).

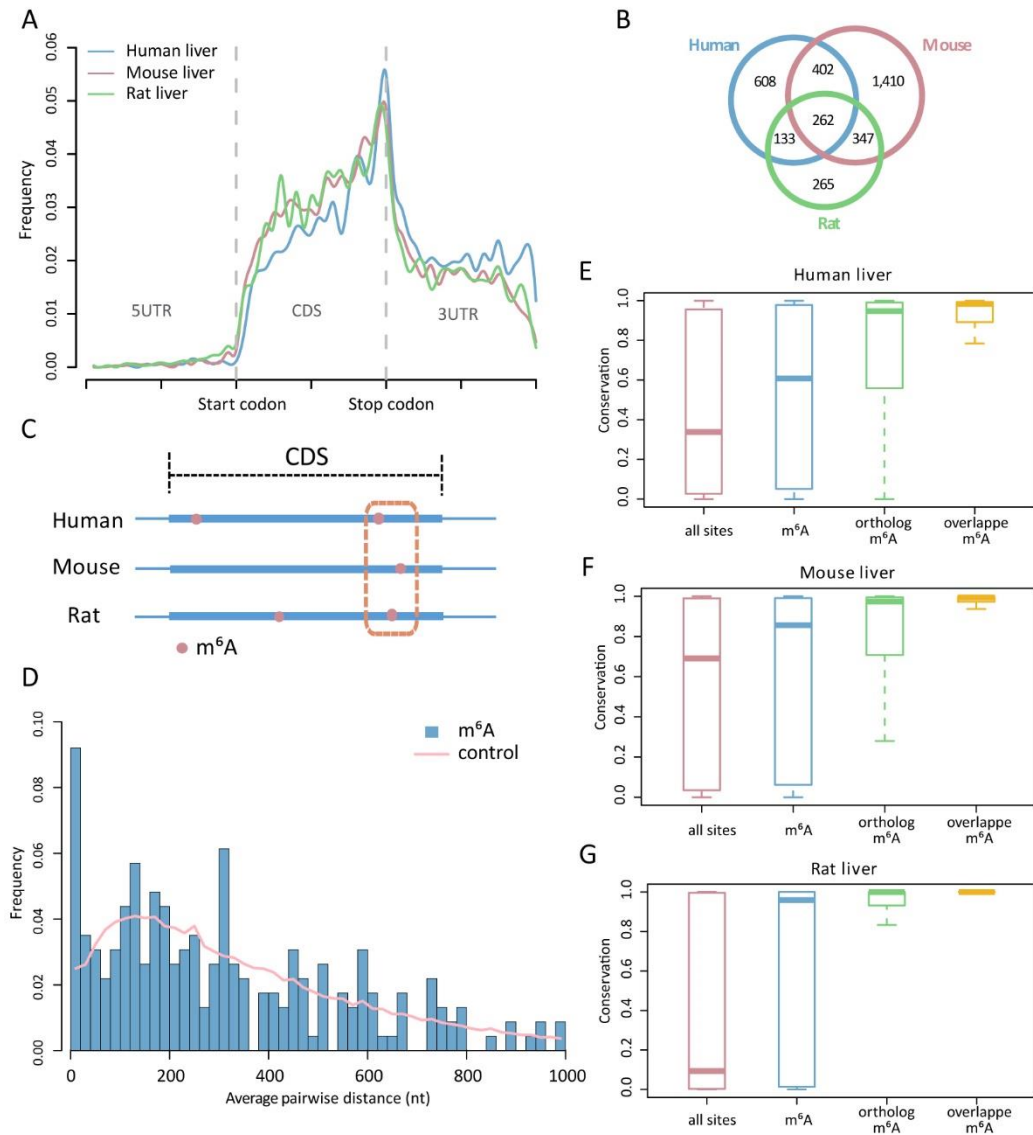

**Fig. S9. Conservation of m<sup>6</sup>A in mammalian liver.** (A) Metagene plots of m<sup>6</sup>A in the liver of human, mouse and rat. (B) Shared m<sup>6</sup>A-modified genes among three species. (C) Diagram showing the m<sup>6</sup>A sites conserved in the corresponding short regions from different species. (D) Frequency of distances for pairwise m<sup>6</sup>A in liver. Randomly picked ACA motifs were assigned for the same analysis as control. (E-G) Conservation scores of all m<sup>6</sup>A sites, methylation sites in ortholog genes and conserved m<sup>6</sup>A sites were compared to that for all A sites in ACA motifs (Wilcoxon test, p-values < 0.0003).



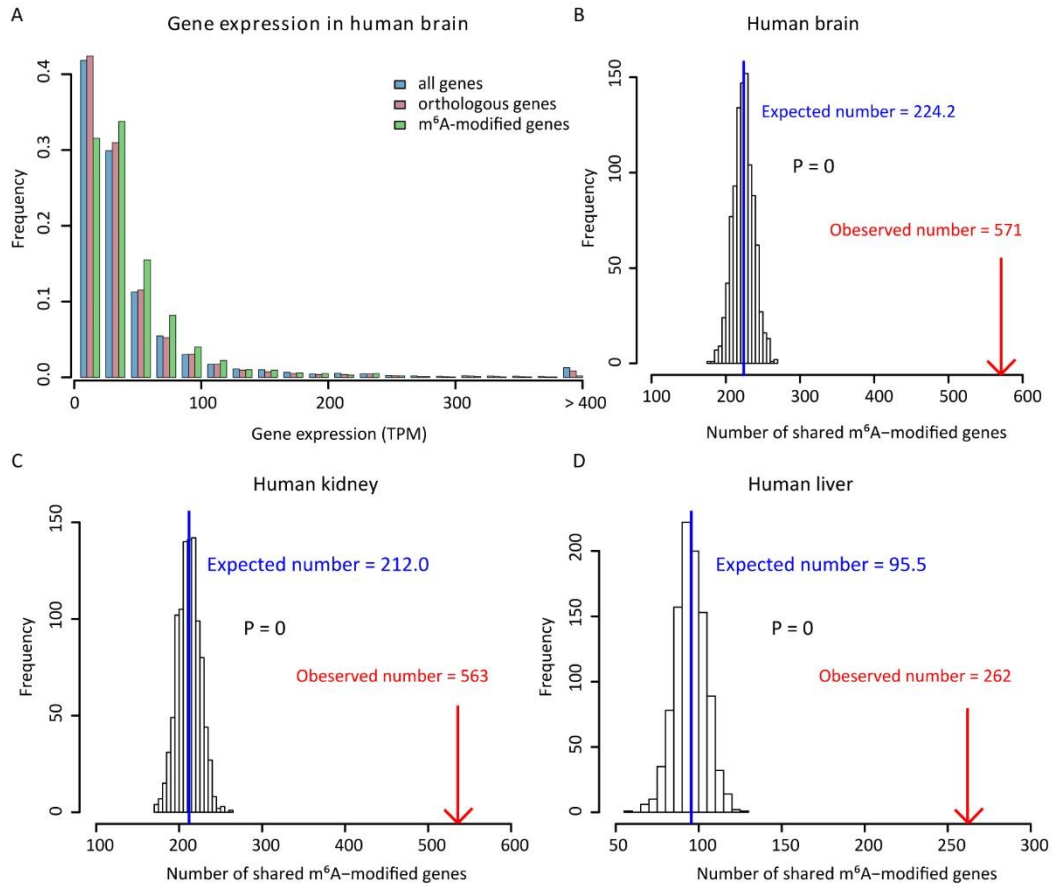

**Fig. S10. Gene expression and the expected number of shared m<sup>6</sup>A-modified genes.** (A) The distribution of gene expressions of all genes, ortholog genes and m<sup>6</sup>A-modified genes in human brain. The tissue specific expression data were obtained from GTEx Analysis V7 (<https://www.gtexportal.org/home/datasets>). (B-D) In order to control the potential detection bias between highly and lowly expressed genes, we ranked the expressions of ortholog genes and divided them into 10 equal-sized bins for random sampling. In each bin, we randomly picked k genes, where k is the number of human m<sup>6</sup>A-modified genes in this bin, and counted the number of mouse and rat m<sup>6</sup>A-modified genes within these k genes; this number represents the expected number of m<sup>6</sup>A-modified genes in the bin that were shared in all three species by chance. This step was performed for all bins and the total number (T) of m<sup>6</sup>A-modified genes in all species by chance was obtained. We repeated this process 1,000 times and plotted the distribution of acquired 1,000 T values. The actual number of shared m<sup>6</sup>A-modified genes among three species in the human brain, kidney and liver (571, 563 and 262, respectively) were significantly greater than expected number from random sampling. Hence, controlling for the potential detection bias does not alter the conclusion that m<sup>6</sup>A-modified genes are evolutionarily conserved.

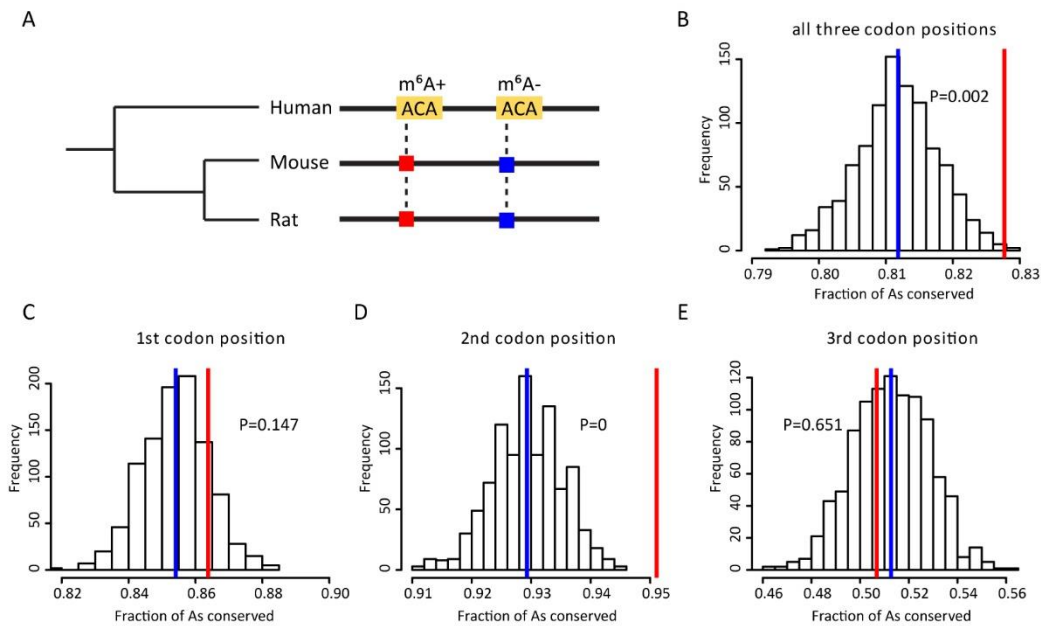

**Fig. S11. Evolutionary conservation between methylated and unmethylated A sites in the same genes of brain tissue.** (A) Schematic diagram illustrating the evolutionary conservation between methylated ( $m^6A+$ ) and unmethylated ( $m^6A-$ ) sites in human, mouse and rat. We test whether human  $m^6A$  sites are more likely than unmethylated A to remain A in mouse and rat. The human ACA motifs are highlighted in yellow. The red and blue box indicates the corresponding sites in mouse and rat. (B-E) Frequency distribution of the fraction of conserved human  $m^6A-$  sites in 1,000 random sets with the sample size equal to the number of  $m^6A+$  sites at all three codon positions (B) or at three codon positions respectively (C-E). Red and blue lines indicate the fraction of conserved  $m^6A+$  sites and the mean fraction of conserved  $m^6A-$  sites in 1,000 random sets for all positions or individual codon positions concerned. P-value is the fraction of the distribution on the right side of the red line.

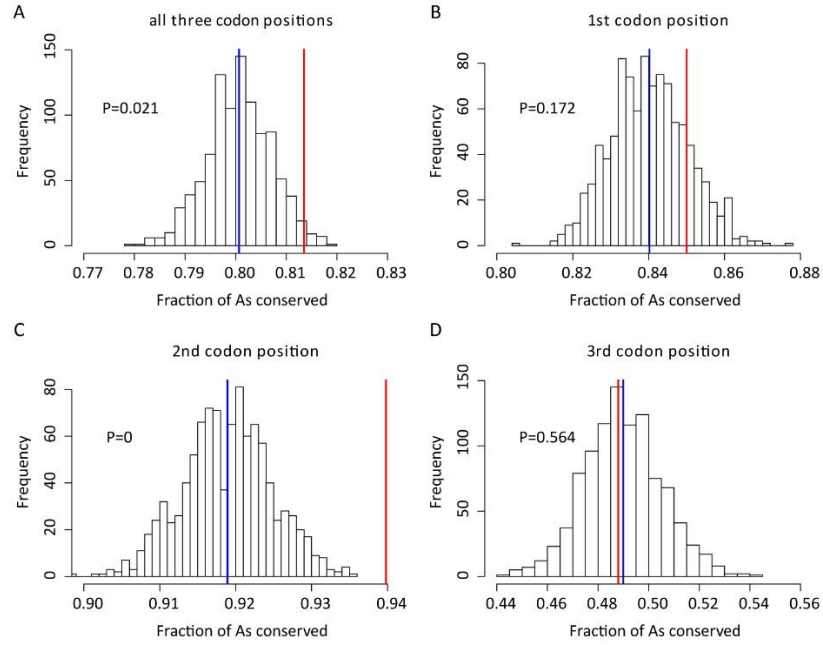

**Fig. S12. Evolutionary conservation between methylated and unmethylated A sites in the same genes of kidney tissue.** Schematic diagram illustrating the evolutionary conservation between methylated ( $m^6A^+$ ) and unmethylated ( $m^6A^-$ ) sites in human, mouse and rat is the same as Fig. S11A. Frequency distribution of the fraction of conserved human  $m^6A^-$  sites in 1,000 random sets with the sample size equal to the number of  $m^6A^+$  sites at all three codon positions (A) or at three codon positions separately (B-D). Red and blue lines respectively indicate the fraction of conserved  $m^6A^+$  sites and the mean fraction of conserved  $m^6A^-$  sites in 1,000 random sets for all positions or individual codon positions concerned. P-value is the fraction of the distribution on the right side of the red line.

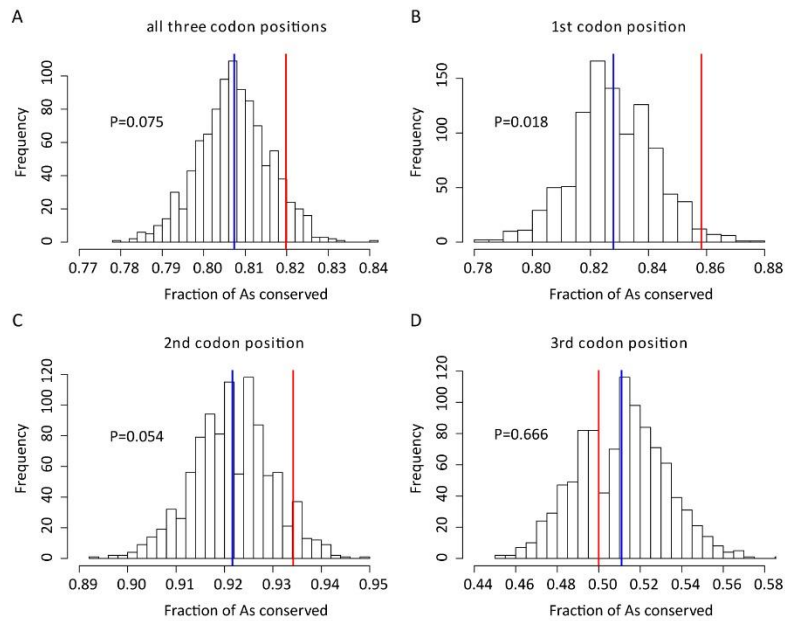

**Fig. S13. Evolutionary conservation between methylated and unmethylated A sites in the same genes of liver tissue.** Schematic diagram illustrating the evolutionary conservation between methylated ( $m^6A^+$ ) and unmethylated ( $m^6A^-$ ) sites in human, mouse and rat is the same as Fig. S11A. Frequency distribution of the fraction of conserved human  $m^6A^-$  sites in 1,000 random sets with the sample size equal to the number of  $m^6A^+$  sites at all three codon positions (**A**) or at three codon positions separately (**B-D**). Red and blue lines respectively indicate the fraction of conserved  $m^6A^+$  sites and the mean fraction of conserved  $m^6A^-$  sites in 1,000 random sets for all positions or individual codon positions concerned. P-value is the fraction of the distribution on the right side of the red line.

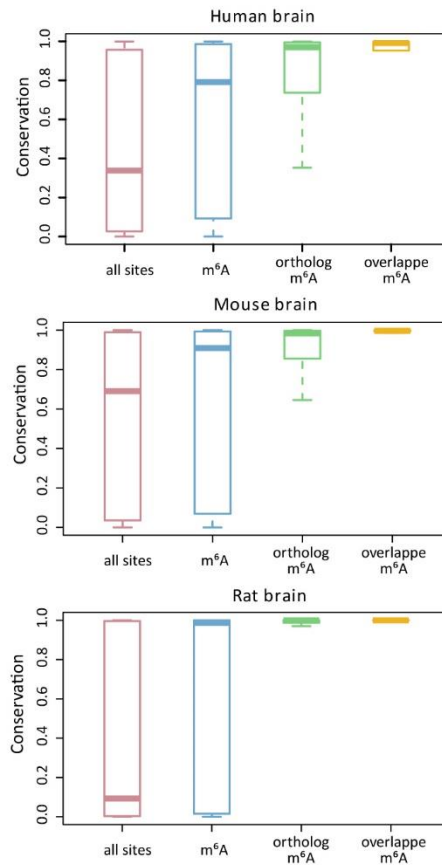

**Fig. S14. Conservation scores for brain.** Conservation scores of all m<sup>6</sup>A sites, methylation sites in ortholog genes and conserved m<sup>6</sup>A sites were compared to that for all A sites in ACA motifs (Wilcoxon test, p-values < 9×10<sup>-10</sup>).

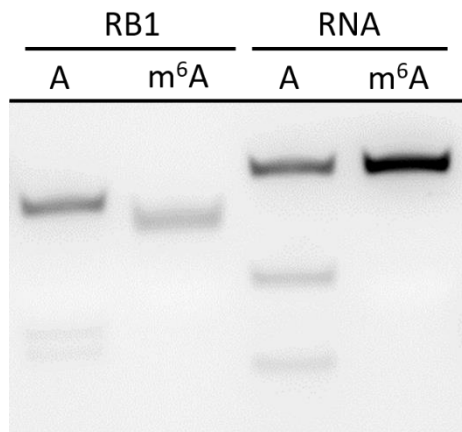

**Fig. S15. Validation for the methylation sensitivity of mutated MazF-K56A.** Two synthetic RNA oligonucleotides were used as the substrates (RB1 and RNA). The sequences can be found in Methods section.

**Table S1. Basic information of sequencing data for human HEK293T cell line.**

| Replicates | Treatment | Clean data<br>(million reads) | Mapped reads<br>(million reads) | Mean coverage<br>(Q20*) | # covered<br>transcripts |
|------------|-----------|-------------------------------|---------------------------------|-------------------------|--------------------------|
| Rep1-MazF  | MazF      | 20.14                         | 15.15                           | 2.96                    | 30,235                   |
| Rep1-FTO   | FTO-MazF  | 33.29                         | 24.90                           | 4.14                    | 31,271                   |
| Rep2-MazF  | MazF      | 21.02                         | 15.59                           | 2.96                    | 30,338                   |
| Rep2-FTO   | FTO-MazF  | 18.49                         | 13.56                           | 2.75                    | 30,614                   |
| Rep3-MazF  | MazF      | 23.62                         | 17.67                           | 3.21                    | 30,490                   |
| Rep3-FTO   | FTO-MazF  | 15.00                         | 10.19                           | 2.23                    | 30,129                   |

\* Q20 indicated mapping quality  $\geq 20$ .

**Table S2. Designed probes and universal primers for T3 ligase-based validation. rG and rU indicates ribonucleotide.**

| Chr.              | Location  | Probe   | Sequences                                                          |
|-------------------|-----------|---------|--------------------------------------------------------------------|
| chr4              | 6718671   | probe L | CCATAAGCAGGATTGCAATTCACCTCATACTGGAGGTAAG<br>ATATCGACCTGTACCTCT     |
| chr4              | 6718671   | probe R | ATCTCATCCCTGCGTGTCAAGTAACTTTAAAATCCCACACT<br>CCAACATCATATATrGrU    |
| chr9              | 119462465 | probe L | CACTGAAAAGGTGGAGCAGATCCCCTGAAGCATGCACAGT<br>GATATCGACCTGTACCTCT    |
| chr9              | 119462465 | probe R | ATCTCATCCCTGCGTGTCACTGAGACATAATGTTACGGGAA<br>TATGATGTCTTAAATrGrU   |
| chr1              | 29070177  | probe L | CCACTGCCGTTGACACTGAAAAGTAAGTAAACGGGGCCCTTG<br>ATATCGACCTGTACCTCT   |
| chr1              | 29070177  | probe R | ATCTCATCCCTGCGTGTCTCCACAGCAGATTTCATTTCTGC<br>CACGCCACAGAAGTrGrU    |
| chr22             | 38202158  | probe L | CCGCAAGAAAAGACTTCATTGTCACTTCTTCTTGCCGGCCG<br>ATATCGACCTGTACCTCT    |
| chr22             | 38202158  | probe R | ATCTCATCCCTGCGTGTCAAGAAAATTATTACAGAAAATAG<br>GAGACAGGAGGGAGTrGrU   |
| chr16             | 69362741  | probe L | CCGTAAGTATTTCAAGGGCAAACATTTCTGACATCTTCTCTGA<br>TATCGACCTGTACCTCT   |
| chr16             | 69362741  | probe R | ATCTCATCCCTGCGTGTCTGGGGGTGATTTTCTCCTCAAGTT<br>GTAGCCAACATTTTrGrU   |
| chr22             | 21307376  | probe L | TCATATTCCTCTGAGCAAACATCACAAGAGCAGTGGCCATG<br>ATATCGACCTGTACCTCT    |
| chr22             | 21307376  | probe R | ATCTCATCCCTGCGTGTCTGGCAAAAAACCACATCATCCCTT<br>TTCAAAAATAAAATrGrU   |
| chr1              | 227152794 | probe L | GGAGGCTCCGGCTGCATGCGGGACTGAGAAGTGAACTCC<br>GATATCGACCTGTACCTCT     |
| chr1              | 227152794 | probe R | ATCTCATCCCTGCGTGTCTGCGCTGACTGGTCTGGGAGCGGAG<br>GCTGAAGAGAAGTCTrGrU |
| chr3              | 99886615  | probe L | GGTTCCTCCTAAGTTTTACCCACTTAGGACAAATTTCTTTGA<br>TATCGACCTGTACCTCT    |
| chr3              | 99886615  | probe R | ATCTCATCCCTGCGTGTCTGCGATGATCAGCATCAGGAC<br>CGATTTCTTCTCACTrGrU     |
| chr19             | 41785018  | probe L | AGACGGAAGGTGCTTCACGGAGATTTCTCATTGATCTTCG<br>ATATCGACCTGTACCTCT     |
| chr19             | 41785018  | probe R | ATCTCATCCCTGCGTGTCTGGGACCAGCCGATACGGACCAG<br>TGGGGGTCAGGCTCTrGrU   |
| Universal primers | FP        |         | CCATCTCATCCCTGCGTGTCT                                              |
| Universal primers | RP        |         | AGAGGTACAGGTTCGATATCA                                              |

**Table S3. Designed primers for Quantitative PCR validation.**

| Chr.  | Location  | Probe ID | Sequences            |
|-------|-----------|----------|----------------------|
| chr16 | 87865500  | H1-FP    | TGTCACGCTCATGTCCTGTC |
| chr16 | 87865500  | H1-RP    | CACGGGAACAACAGAAACAA |
| chr6  | 31130366  | H2-FP    | TCCTCGGAAGTACCCAGTGA |
| chr6  | 31130366  | H2-RP    | ACATGGAACCAGACGTCACA |
| chr19 | 41785018  | H3-FP    | TTGCATACCTGTGGTCAGGA |
| chr19 | 41785018  | H3-RP    | AGGAGAAAGGCTCTTCGCCT |
| chr9  | 131763970 | L1-FP    | TCCTCACCCTCTAGAGGTG  |
| chr9  | 131763970 | L1-RP    | GTTGGTGCTCAGCTGGTACA |
| chr19 | 59059888  | L2-FP    | TCAATGCCTGGACCAAGAGT |
| chr19 | 59059888  | L2-RP    | ATAGCCTTCCTGCACCTCCA |
| chr16 | 30537003  | L3-FP    | TCAACTGGTGTCTGGCTGAT |
| chr16 | 30537003  | L3-RP    | CACCATAGGAGAGTCTCAGT |
| --    | --        | Gapdh-FP | TGAGTACGTCGTGGAGTCCA |
| --    | --        | Gapdh-RP | TTCACACCCATGACGAACAT |

**Table S4. Basic information of sequencing data for mammalian tissues.**

| Species | Tissue | Treatment | Clean data<br>(million reads) | Mapped reads<br>(million reads) | Mean coverage<br>(Q20*) | # covered<br>transcripts |
|---------|--------|-----------|-------------------------------|---------------------------------|-------------------------|--------------------------|
| Human   | Brain  | MazF      | 24.62                         | 18.19                           | 2.20                    | 35,285                   |
| Human   | Brain  | FTO-MazF  | 24.79                         | 18.24                           | 2.11                    | 35,295                   |
| Human   | Liver  | MazF      | 26.55                         | 19.44                           | 2.43                    | 33,849                   |
| Human   | Liver  | FTO-MazF  | 27.61                         | 19.92                           | 2.24                    | 33,695                   |
| Human   | Kidney | MazF      | 26.58                         | 18.36                           | 2.30                    | 34,859                   |
| Human   | Kidney | FTO-MazF  | 23.03                         | 16.48                           | 2.03                    | 34,660                   |
| Mouse   | Brain  | MazF      | 14.13                         | 7.46                            | 1.82                    | 46,194                   |
| Mouse   | Brain  | FTO-MazF  | 29.43                         | 17.71                           | 2.52                    | 47,537                   |
| Mouse   | Liver  | MazF      | 21.53                         | 11.73                           | 2.82                    | 42,522                   |
| Mouse   | Liver  | FTO-MazF  | 21.05                         | 11.45                           | 2.75                    | 42,194                   |
| Mouse   | Kidney | MazF      | 18.71                         | 10.99                           | 2.17                    | 44,831                   |
| Mouse   | Kidney | FTO-MazF  | 27.30                         | 15.57                           | 2.48                    | 45,584                   |
| Mouse   | Heart  | MazF      | 15.76                         | 8.31                            | 1.96                    | 44,363                   |
| Mouse   | Heart  | FTO-MazF  | 49.02                         | 27.23                           | 6.88                    | 46,070                   |
| Mouse   | Testis | MazF      | 17.09                         | 10.41                           | 1.93                    | 52,981                   |
| Mouse   | Testis | FTO-MazF  | 25.47                         | 14.83                           | 2.23                    | 53,674                   |
| Rat     | Brain  | MazF      | 10.90                         | 7.26                            | 1.58                    | 54,593                   |
| Rat     | Brain  | FTO-MazF  | 12.81                         | 8.14                            | 1.60                    | 55,004                   |
| Rat     | Liver  | MazF      | 12.55                         | 7.52                            | 2.31                    | 48,170                   |
| Rat     | Liver  | FTO-MazF  | 15.82                         | 9.75                            | 2.58                    | 48,489                   |
| Rat     | Kidney | MazF      | 14.83                         | 9.13                            | 2.06                    | 53,011                   |
| Rat     | Kidney | FTO-MazF  | 14.45                         | 8.67                            | 1.93                    | 52,712                   |

\* Q20 indicated mapping quality  $\geq 20$ .

**Table S5. m<sup>6</sup>A sites identified by m<sup>6</sup>A-REF-seq for mammalian tissues.**

| Species | Tissue | # m <sup>6</sup> A sites |
|---------|--------|--------------------------|
| Human   | Brain  | 9,244                    |
| Human   | Liver  | 5,312                    |
| Human   | Kidney | 9,225                    |
| Mouse   | Brain  | 16,161                   |
| Mouse   | Liver  | 8,318                    |
| Mouse   | Kidney | 7,938                    |
| Mouse   | Heart  | 4,419                    |
| Mouse   | Testis | 9,456                    |
| Rat     | Brain  | 4,720                    |
| Rat     | Liver  | 3,554                    |
| Rat     | Kidney | 6,907                    |

**Table S6. Shared m<sup>6</sup>A-modified genes and m<sup>6</sup>A sites between pairwise species and the significance.** The hypergeometric test was used to test the significance.

| Brain                         |                        |                        |       | Brain                         |                       |                        |     |
|-------------------------------|------------------------|------------------------|-------|-------------------------------|-----------------------|------------------------|-----|
| shared-m <sup>6</sup> A genes |                        |                        |       | shared-m <sup>6</sup> A sites |                       |                        |     |
|                               | Human                  | Mouse                  | Rat   |                               | Human                 | Mouse                  | Rat |
| Human                         |                        | 1,456                  | 704   | Human                         |                       | 229                    | 105 |
| Mouse                         | $8.6 \times 10^{-311}$ |                        | 1,003 | Mouse                         | $1.2 \times 10^{-26}$ |                        | 267 |
| Rat                           | $9.8 \times 10^{-197}$ | $2.7 \times 10^{-322}$ |       | Rat                           | $2.1 \times 10^{-30}$ | $1.2 \times 10^{-105}$ |     |
| Kidney                        |                        |                        |       | Kidney                        |                       |                        |     |
| shared-m <sup>6</sup> A genes |                        |                        |       | shared-m <sup>6</sup> A sites |                       |                        |     |
|                               | Human                  | Mouse                  | Rat   |                               | Human                 | Mouse                  | Rat |
| Human                         |                        | 1,065                  | 911   | Human                         |                       | 136                    | 108 |
| Mouse                         | $3.2 \times 10^{-228}$ |                        | 947   | Mouse                         | $5.5 \times 10^{-20}$ |                        | 190 |
| Rat                           | $5.0 \times 10^{-212}$ | $1.4 \times 10^{-256}$ |       | Rat                           | $5.0 \times 10^{-17}$ | $7.5 \times 10^{-68}$  |     |
| Liver                         |                        |                        |       | Liver                         |                       |                        |     |
| shared-m <sup>6</sup> A genes |                        |                        |       | shared-m <sup>6</sup> A sites |                       |                        |     |
|                               | Human                  | Mouse                  | Rat   |                               | Human                 | Mouse                  | Rat |
| Human                         |                        | 664                    | 395   | Human                         |                       | 97                     | 65  |
| Mouse                         | $2.2 \times 10^{-154}$ |                        | 609   | Mouse                         | $4.0 \times 10^{-23}$ |                        | 158 |
| Rat                           | $4.6 \times 10^{-139}$ | $2.1 \times 10^{-213}$ |       | Rat                           | $2.3 \times 10^{-28}$ | $3.1 \times 10^{-80}$  |     |
